# Supplementary material for: Inhibitory Effects of the Two Novel TSPO Ligands 2-Cl-MGV-1 and MGV-1 on LPS-induced Microglial Activation
Source: Cells. 2019 May 22;8(5):486. doi: 10.3390/cells8050486 (PMC6562711; doi:10.3390/cells8050486)
Supplement: Supplementary file 1 [file cells-08-00486-s001.pdf]

## Supplementary data

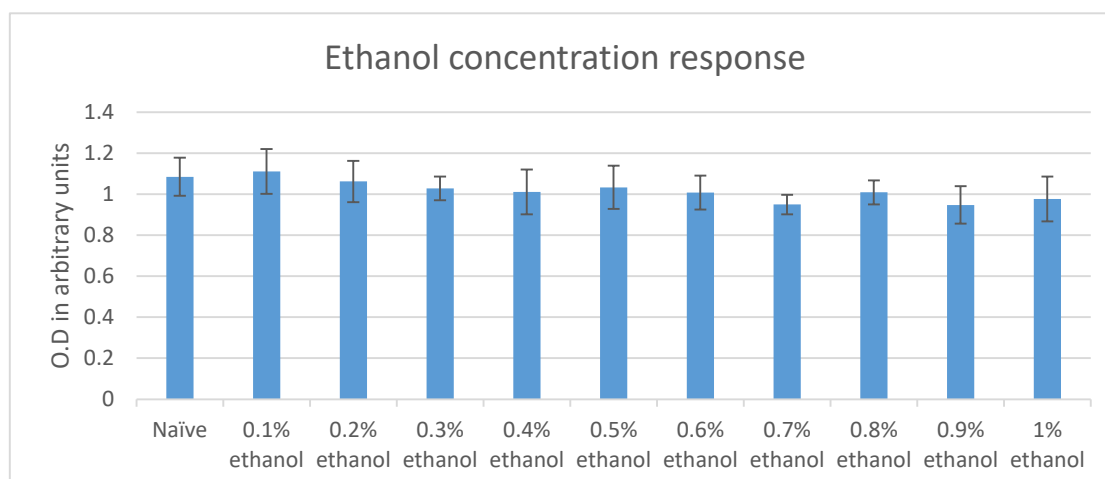

**Figure S1. Ethanol concentration response on BV-2 cell death as measured by LDH release.**

BV-2 cells ( $n = 8$  in each group) were exposed to various concentrations of ethanol (0% to 1%) for 24 hours and LDH assessment was performed. No significant changes in LDH levels for the various concentrations of ethanol were detected. (ANOVA,  $p > 0.05$ ).

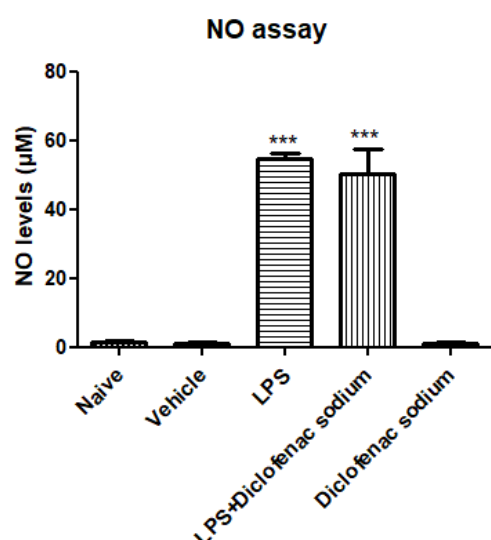

**Figure S2. Effect of diclofenac sodium on nitric oxide levels in BV-2 cells.** BV-2 cells were exposed to 100 ng/ml LPS for 24 hours simultaneously with or without diclofenac sodium (25 µM). NO levels were calculated using a standard calibration curve and presented as means  $\pm$  SD;  $n = 8$ . ANOVA with Bonferroni's post-hoc test was performed. \*\*\*  $p < 0.0001$  compared to both naïve and vehicle groups.
